# Supplementary material for: Manu Militari: The Institutional Contingencies of Stakeholder Relationships on Entrepreneurial Performance
Source: Atypon-hosted journal article supplement (doi:10.1287/orsc.2017.1178), 2018-04-13
Supplement: orsc.2017.1178-sm.pdf [file orsc.2017.1178-sm.pdf]

## APPENDIX

**Figure 1: Two-Way Interaction of Political Ties and Declining Economic Environment**

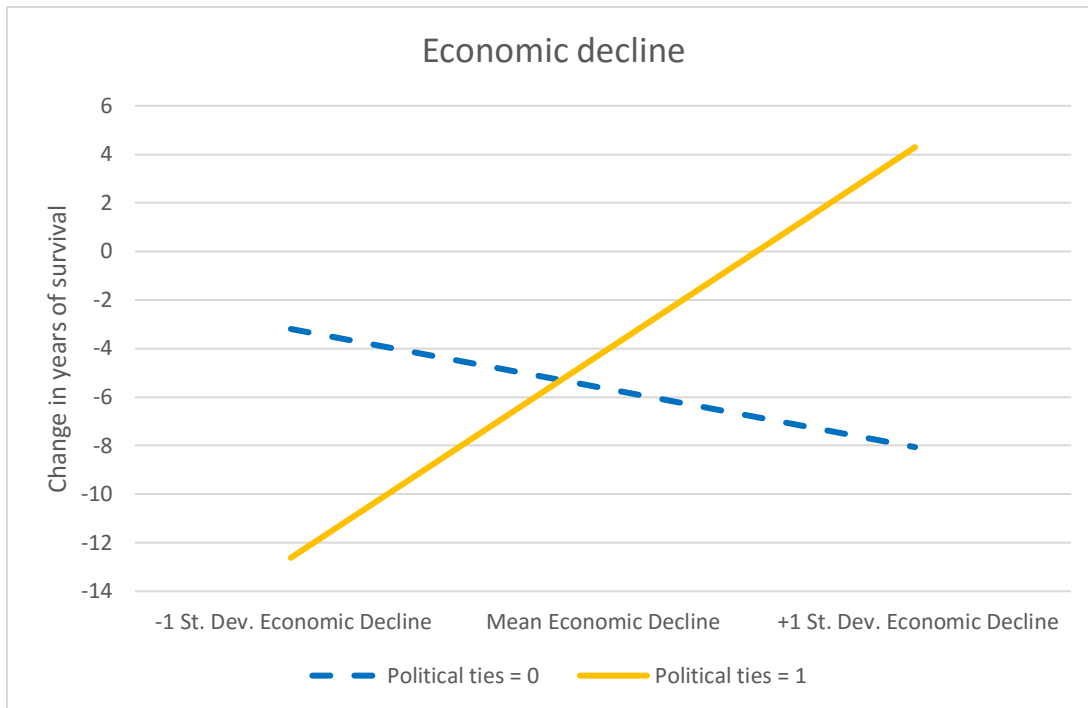

**Figure 2: Two-Way Interaction of Political Ties and Political Effectiveness**

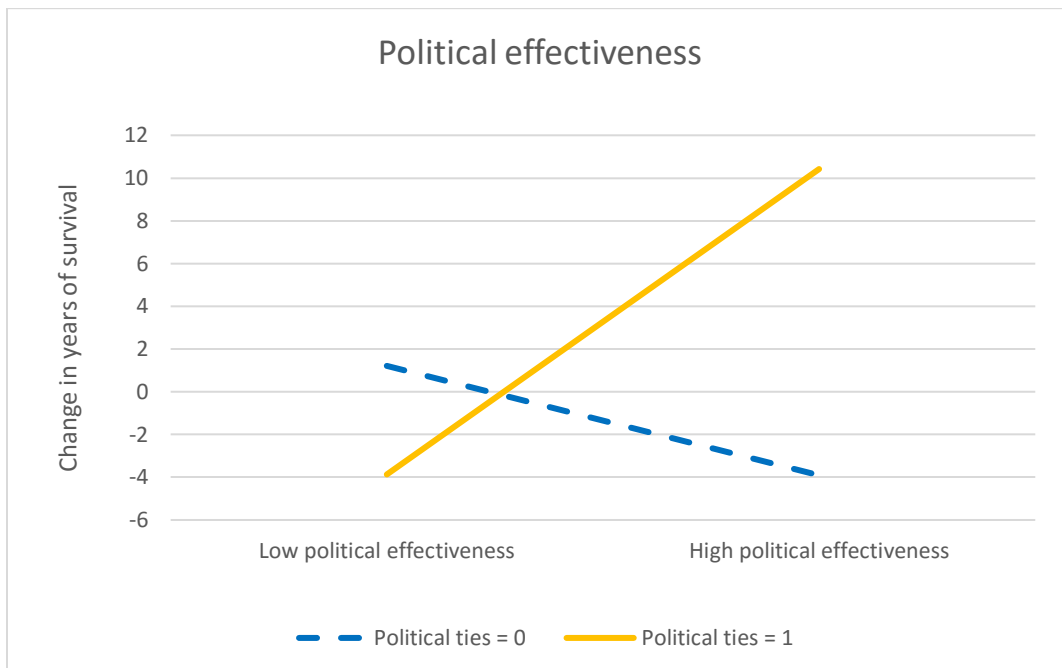

**Figure 3: Two-Way Interaction of Military Ties and Armed Conflict**

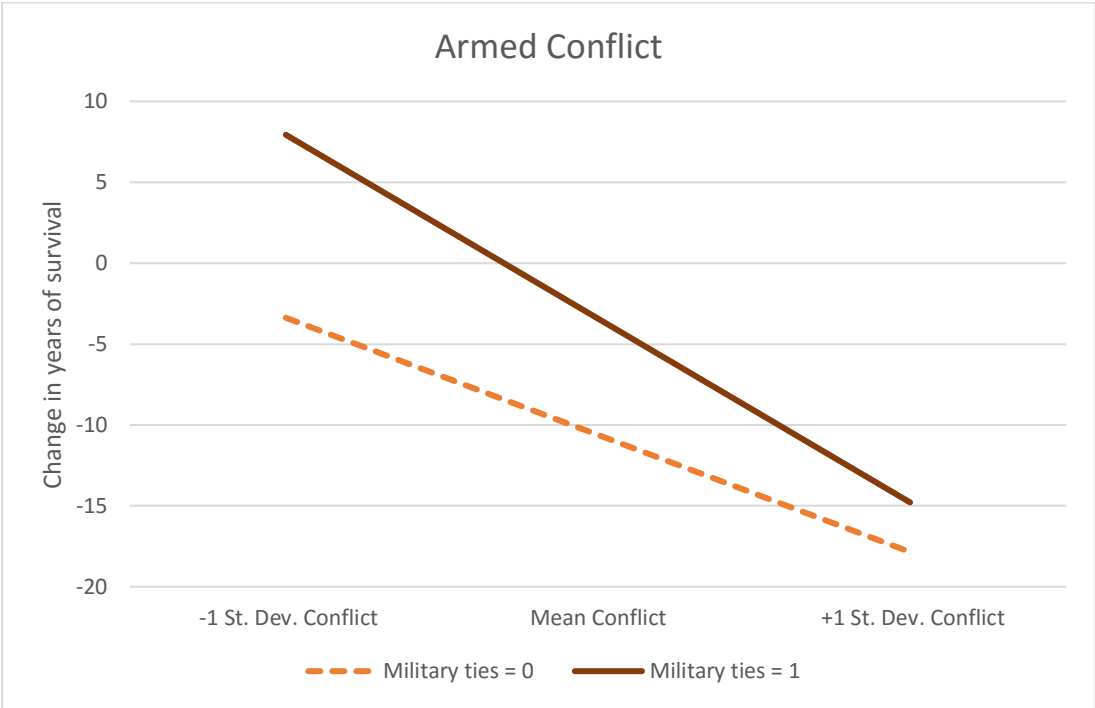

**Figure 4: Two-Way Interaction of Military Ties and Revolutions**

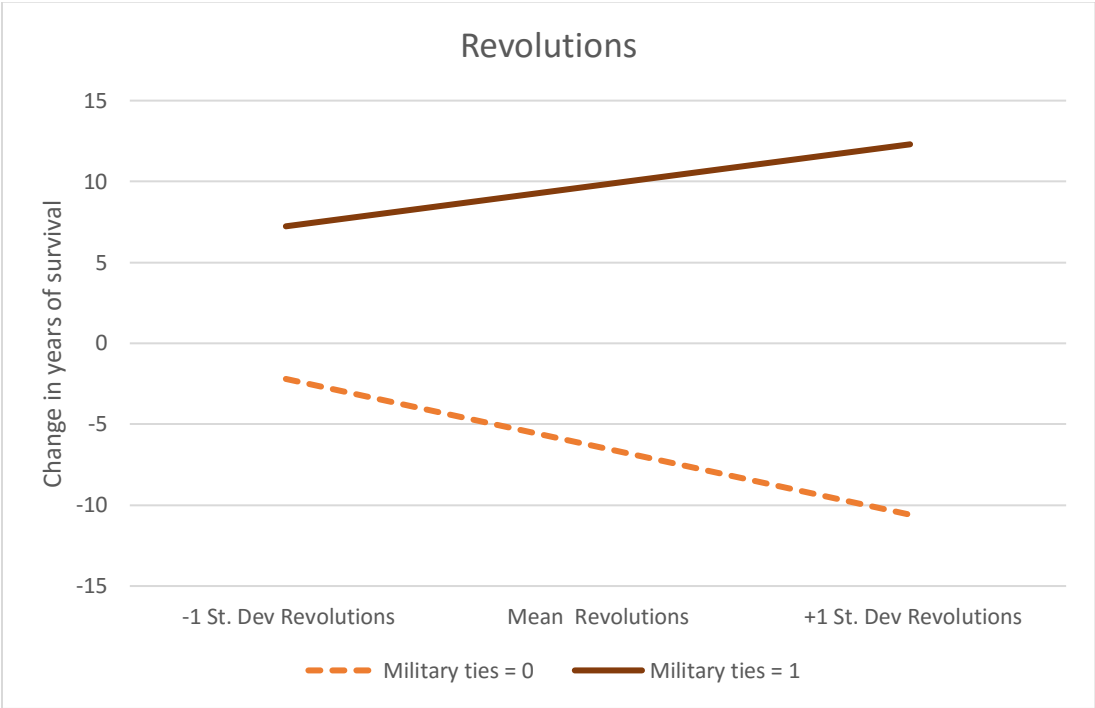

**Table A1: First-stage Probit Model Predicting Military Ties at Venture Founding**

| Variables                                      | Failure Model 1      |
|------------------------------------------------|----------------------|
| <i>Instrumental Variables</i>                  |                      |
| Military size                                  | 0.001***<br>(0.000)  |
| Percentage of workers in industrial production | -0.001***<br>(0.000) |
| <i>Organizational variables</i>                |                      |
| Political ties                                 | -0.128***<br>(0.018) |
| Airline age                                    | 0.005***<br>(0.001)  |
| Airline size                                   | 0.000***<br>(0.000)  |
| Foreign ownership                              | -0.141***<br>(0.021) |
| Domestic airline                               | -0.024<br>(0.017)    |
| State investment                               | 0.441***<br>(0.018)  |
| <i>Environmental variables</i>                 |                      |
| Airline-sector age                             | -0.000<br>(0.001)    |
| Airline-sector density                         | 0.004+<br>(0.002)    |
| Armed conflict                                 | -0.021***<br>(0.005) |
| Country fiscal budget balance / 10,000         | -0.006<br>(0.009)    |
| Country GDP in billions                        | -0.001***<br>(0.000) |
| Country population (logged)                    | -0.137***<br>(0.015) |
| Political institution stability                | 0.000<br>(0.000)     |
| Government revolutions                         | -0.012<br>(0.021)    |
| Political effectiveness                        | 0.000<br>(0.009)     |
| Political constraint                           | -0.072<br>(0.046)    |
| Total trade per capita                         | 55.687***<br>(6.481) |
| Trade balance / 1000                           | 0.472***<br>(0.066)  |
| Constant                                       | 2.519***<br>(0.247)  |
| Standard errors in parentheses                 |                      |
| *** p<0.001, ** p<0.01, * p<0.05, + p<0.10     |                      |

**Table A2: Second-stage Probit of Impact of Military Ties on Venture Failure**

| Variables                                  | Model 1              |
|--------------------------------------------|----------------------|
| <i>Organizational variables</i>            |                      |
| Military ties                              | -1.756**<br>(0.592)  |
| Political ties                             | -0.407**<br>(0.125)  |
| Airline age                                | 0.001<br>(0.007)     |
| Airline size                               | -0.000+<br>(0.000)   |
| Foreign ownership                          | -0.150<br>(0.162)    |
| Domestic airline                           | -0.146<br>(0.099)    |
| State investment                           | 0.527+<br>(0.313)    |
| <i>Environmental variables</i>             |                      |
| Airline-sector age                         | -0.001<br>(0.004)    |
| Airline-sector density                     | 0.025*<br>(0.011)    |
| Armed conflict                             | -0.132***<br>(0.033) |
| Country fiscal budget balance / 10,000     | -0.300**<br>(0.107)  |
| Country GDP in billions                    | -0.002*<br>(0.001)   |
| Country population (logged)                | -0.117<br>(0.094)    |
| Political institution stability            | 0.003*<br>(0.001)    |
| Government revolutions                     | 0.009<br>(0.118)     |
| Political effectiveness                    | -0.115+<br>(0.060)   |
| Political constraint                       | 0.009<br>(0.277)     |
| Total trade per capita                     | 38.662<br>(79.890)   |
| Trade balance / 1000                       | 0.041<br>(0.786)     |
| Constant                                   | 1.317<br>(1.665)     |
| <i>N</i>                                   | 3520                 |
| Wald chi squared                           | 128.67***            |
| Standard errors in parentheses             |                      |
| *** p<0.001, ** p<0.01, * p<0.05, + p<0.10 |                      |

**Table A2: Event-History Model Predicting Failure of Ventures with Three-way Interactions**

| <b>Variables</b>                                                            | <b>Model 8</b>       | <b>Model 9</b>       | <b>Model 10</b>       | <b>Model 11</b>       | <b>Model 12</b>       |
|-----------------------------------------------------------------------------|----------------------|----------------------|-----------------------|-----------------------|-----------------------|
| <i>Predictor Variables</i>                                                  |                      |                      |                       |                       |                       |
| Military ties                                                               | -1.475**<br>(0.455)  | -1.856***<br>(0.407) | -1.798***<br>(0.381)  | -1.702***<br>(0.388)  | -1.607***<br>(0.445)  |
| Political ties                                                              | -0.834*<br>(0.345)   | -0.237<br>(0.332)    | -0.712*<br>(0.341)    | -0.497<br>(0.312)     | -0.881+<br>(0.455)    |
| Military ties X Declining economic environment<br>X Airline-sector density  | 0.862<br>(1.070)     |                      |                       |                       | 0.820<br>(0.612)      |
| Political ties X Declining economic environment<br>X Airline-sector density | -0.353***<br>(0.090) |                      |                       |                       | -0.667**<br>(0.231)   |
| Military ties X High political effectiveness X<br>Airline-sector density    |                      | 0.022<br>(0.047)     |                       |                       | 0.112<br>(0.081)      |
| Political ties X High political effectiveness X<br>Airline-sector density   |                      | -0.490*<br>(0.241)   |                       |                       | -0.380*<br>(0.193)    |
| Military ties X Armed conflict X Domestic<br>airline                        |                      |                      | -11.665***<br>(0.782) |                       | -10.965***<br>(0.894) |
| Political ties X Armed conflict X Domestic<br>airline                       |                      |                      | 0.464*<br>(0.207)     |                       | 0.100<br>(0.238)      |
| Military ties X Government revolutions X<br>Domestic airline                |                      |                      |                       | -15.743***<br>(0.464) | -14.462***<br>(0.515) |
| Political ties X Government revolutions X<br>Domestic airline               |                      |                      |                       | -0.505<br>(1.101)     | 0.324<br>(1.122)      |
| <i>Organizational variables</i>                                             |                      |                      |                       |                       |                       |
| Airline age (logged)                                                        | 0.334***<br>(0.052)  | 0.329***<br>(0.054)  | 0.336***<br>(0.053)   | 0.326***<br>(0.053)   | 0.335***<br>(0.054)   |
| Airline size (logged)                                                       | -0.060***<br>(0.011) | -0.060***<br>(0.011) | -0.057***<br>(0.011)  | -0.057***<br>(0.011)  | -0.060***<br>(0.011)  |
| Foreign investment                                                          | -0.236<br>(0.347)    | -0.277<br>(0.355)    | -0.278<br>(0.352)     | -0.259<br>(0.354)     | -0.255<br>(0.343)     |
| Domestic airline                                                            | -0.334<br>(0.294)    | -0.328<br>(0.286)    | -0.348<br>(0.298)     | -0.319<br>(0.293)     | -0.365<br>(0.284)     |
| State investment                                                            | 0.086<br>(0.323)     | 0.124<br>(0.323)     | 0.113<br>(0.321)      | 0.109<br>(0.319)      | 0.127<br>(0.330)      |
| <i>Environmental variables</i>                                              |                      |                      |                       |                       |                       |
| Airline-sector age (square rooted)                                          | -0.217***<br>(0.021) | -0.215***<br>(0.021) | -0.218***<br>(0.021)  | -0.217***<br>(0.021)  | -0.219***<br>(0.021)  |
| Airline-sector density (square rooted)                                      | 0.170***<br>(0.027)  | 0.174***<br>(0.028)  | 0.174***<br>(0.027)   | 0.175***<br>(0.028)   | 0.172***<br>(0.027)   |
| Armed conflict                                                              | -0.180*<br>(0.083)   | -0.186*<br>(0.085)   | -0.212*<br>(0.086)    | -0.174*<br>(0.085)    | -0.202*<br>(0.082)    |
| Country fiscal budget balance / 10,000                                      | -0.779**<br>(0.272)  | -0.770**<br>(0.264)  | -0.790**<br>(0.271)   | -0.786**<br>(0.270)   | -0.763**<br>(0.268)   |
| Country GDP per capita                                                      | -0.000<br>(0.000)    | -0.000<br>(0.000)    | -0.000<br>(0.000)     | -0.000<br>(0.000)     | -0.000+<br>(0.000)    |
| Country population (square rooted)                                          | -0.022***<br>(0.004) | -0.022***<br>(0.005) | -0.022***<br>(0.005)  | -0.022***<br>(0.005)  | -0.022***<br>(0.004)  |

| <b>Variables</b>                            | <b>Model 8</b>       | <b>Model 9</b>       | <b>Model 10</b>      | <b>Model 11</b>      | <b>Model 12</b>      |
|---------------------------------------------|----------------------|----------------------|----------------------|----------------------|----------------------|
| Change in country population                | -7.892+<br>(4.293)   | -7.952+<br>(4.451)   | -8.231*<br>(4.183)   | -7.839+<br>(4.356)   | -8.142+<br>(4.165)   |
| Declining economic environment              | 0.156<br>(0.826)     | 0.196<br>(0.857)     | 0.226<br>(0.866)     | 0.183<br>(0.855)     | 0.348<br>(0.803)     |
| Government revolutions                      | 0.302<br>(0.234)     | 0.302<br>(0.237)     | 0.303<br>(0.235)     | 0.415+<br>(0.247)    | 0.329<br>(0.239)     |
| High political effectiveness                | -0.495<br>(0.448)    | -0.337<br>(0.428)    | -0.495<br>(0.448)    | -0.501<br>(0.449)    | -0.369<br>(0.436)    |
| Political constraint                        | 2.542***<br>(0.753)  | 2.666***<br>(0.749)  | 2.613***<br>(0.766)  | 2.580***<br>(0.767)  | 2.508***<br>(0.706)  |
| Polity index                                | -0.082***<br>(0.025) | -0.085***<br>(0.024) | -0.084***<br>(0.025) | -0.083***<br>(0.024) | -0.084***<br>(0.024) |
| Primary energy consumption (logged)         | 0.084<br>(0.101)     | 0.070<br>(0.099)     | 0.081<br>(0.100)     | 0.077<br>(0.099)     | 0.086<br>(0.103)     |
| Ratio of defense to government expenditures | -0.010***<br>(0.002) | -0.010***<br>(0.002) | -0.010***<br>(0.002) | -0.010***<br>(0.002) | -0.010***<br>(0.002) |
| Constant                                    | -8.600***<br>(0.896) | -8.560***<br>(0.856) | -8.580***<br>(0.865) | -8.634***<br>(0.864) | -8.566***<br>(0.883) |
| No. of observations                         | 3451                 | 3451                 | 3451                 | 3451                 | 3451                 |
| No. of subjects                             | 282                  | 282                  | 282                  | 282                  | 282                  |
| Wald chi squared                            | 479.38***            | 529.96***            | 1781.95***           | 6733.03***           | 6313.78***           |
| Robust standard errors in parentheses       |                      |                      |                      |                      |                      |
| *** p<0.001, ** p<0.01, * p<0.05, + p<0.10  |                      |                      |                      |                      |                      |
